# Supplementary material
Source: Springer Nature journal article supplement (https://www.springermedizin.de/resource/supplementary/12916_2012_627_MOESM4_ESM.pdf/9597956)

Citation

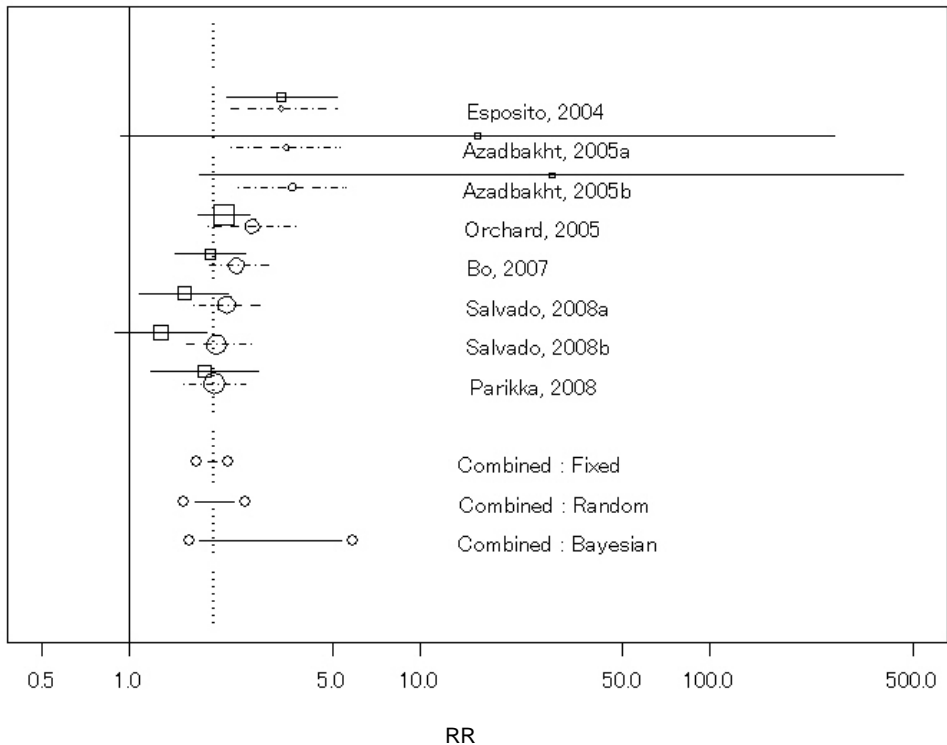

Supplement: MOESM4 [file 9597956]
